# Supplementary material
Source: PubMed Central journal article supplement (PMC6990696)
Supplement: jama-323-140-s002.pdf [file jama-323-140-s002.pdf]

1

2 **THE MEN'S EATING AND LIVING (MEAL) STUDY: A RANDOMIZED TRIAL OF DIET TO ALTER DISEASE**  
3 **PROGRESSION IN PROSTATE CANCER PATIENTS ON ACTIVE SURVEILLANCE**

4

5

6 **Description of the Protocol**

7 This study 70807 opened on 01 December 2010. Since study activation, there have been 9  
8 updates to the original protocol.

9 **Amendments and Statistical Impact**

10 The primary endpoint in this prevention trial is time to clinical progression; each subject will be  
11 followed for two years.

12 The Alliance Data and Safety Monitoring Board (DSMB) have been reviewing interim analyses  
13 of the time to progression endpoint every 6 months. Following the first interim analysis (May  
14 2014), which was conducted when 80 subjects experienced clinical progression or completed  
15 their 2 years of follow-up, it was noted that the clinical progression rate in these active  
16 surveillance patients was higher than expected. At the time of that first interim analysis, the  
17 protocol specified that serum prostate-specific antigen (PSA) doubling time was to be calculated  
18 using the 3 most recent PSA values at each 3-month assessment, starting with study month 6.  
19 This method was found to be overly sensitive to local fluctuations of PSA values during a short  
20 period of time. Consequently, the study was updated (**Amendment 9**) to calculate PSA  
21 doubling time as in the Toronto cohort [1], i.e. using all available PSA values starting from the  
22 study month at which the subject has 3 PSA values.

23 At the time of study activation, 12 and 24 study month prostate biopsies were required. Based  
24 on **Amendment 6**, the prostate biopsy at 12 months was no longer required. Because  
25 pathology information (e.g. Gleason scores) obtained from the prostate biopsies are used, in  
26 part, for determining clinical progression, this study update is noted here.

27 No other study updates impacted the statistical considerations of the protocol.

28 **Description of the Clinical Trial**

29 This is a randomized, phase III clinical trial designed to determine if a telephone-based dietary  
30 intervention compared with no intervention will decrease clinical progression in active  
31 surveillance (AS) prostate cancer patients. Patients must have a biopsy-proven  
32 adenocarcinoma of the prostate diagnosed within 24 months prior to pre-registration; the biopsy  
33 showing diagnosis of prostate cancer is used for the purposes of determining eligibility.  
34 Furthermore, men  $\leq 70$  years old and men  $> 70$  years old must have a biopsy Gleason score  $\leq$   
35 6 and  $\leq (3 + 4) = 7$ , respectively, and a baseline serum PSA  $< 10$  ng/mL to be eligible for the  
36 study. A total of approximately 464 patients will be randomized to this study.

37 Eligible patients will be randomized with equal probability to receive the dietary intervention  
38 (experimental arm) or dietary information (control arm); randomization will be stratified on the  
39 basis of age ( $\leq 70$ ;  $> 70$  years), race (African American; Other), and baseline prostate biopsy (0-  
40 12; 13-24 months prior to registration).

41 After randomization, all patients will participate in a 5-10 minute telephone orientation conducted  
42 by study staff from the Moores UCSD Cancer Center explaining the randomization results and  
43 the next study-related events. The orientation call for the experimental arm participants will  
44 briefly explain the counseling program, the dietary targets, and the scientific rationale supporting  
45 these targets. The UCSD study staff will mail all participants (experimental and control arms) a  
46 copy of the Prostate Cancer Foundation Booklet entitled "Nutrition, Exercise and Prostate  
47 Cancer." Additionally, the experimental arm participants will also be mailed a copy of the study-  
48 specific "Lifestyle Intervention Manual"; the manual outlines the dietary targets, offers supporting  
49 information on strategies to achieve these targets, supplies reference tools to help participants  
50 accurately estimate servings of target foods, and offers recipes and articles about diet and  
51 prostate cancer. Furthermore, each participant on the experimental arm will be assigned a  
52 personal counselor.

53 Each patient will be followed for 24 months, and serum PSA will be evaluated every 3 months  
54 starting from baseline (i.e. prior to randomization). Prostate biopsies are taken at baseline, 12,  
55 and 24 months.

#### 56 **Power and Sample Size**

57 Clinical criteria for progression are any of the following occurring:

- 58 a) PSA doubling time  $< 3$  years  
59 b) PSA  $\geq 10$  ng/mL at any time  
60 c)  $\geq 25\%$  of biopsy tissue cores positive for cancer or  $> 50\%$  of any one biopsy  
61 tissue core positive for cancer  
62 d) For men  $< 70$  years old, Gleason sum on repeat biopsy  $\geq 7$

63 For men  $\geq 70$  years old, Gleason sum on repeat biopsy  $\geq (4 + 3) = 7$

64 PSA doubling time (in years) will be calculated as the natural logarithm of 2 divided by the  
65 estimated slope obtained from fitting a linear regression of the natural logarithm of PSA on time  
66 (in years) [3]; the PSA doubling time will be calculated at the Alliance Statistics and Data Center.  
67 The first 3 PSA measurements will be used at the 6 month assessment (i.e. baseline, and at  
68 months 3 and 6); from the 9 month assessment onwards, all available PSA measurements will  
69 be used to calculate PSA doubling time, as long as the participant has at least 3 measurements.

70 Centralized pathology review will be conducted on tissue specimens collected at diagnosis and  
71 at study months 12 and 24 to determine changes in tumor volume and Gleason scores;  
72 additionally, centralized pathology review will be conducted on tissue specimens based on

73 repeat biopsies (i.e. additional biopsies) that occurred at the discretion of the treating physician  
74 during the 24-month study period. The centrally reviewed changes in tumor volume and  
75 Gleason scores will be used in lieu of the local changes in tumor volume and Gleason scores,  
76 which are captured on the case report forms, in the definition of clinical progression. Stated  
77 differently, the centrally reviewed pathology will be incorporated in all relevant analyses  
78 described in the statistical analysis plan; however, in the event that centrally reviewed pathology  
79 is unavailable for a particular patient (and time point), the corresponding local pathology  
80 information captured on the case report form (if available) will be used. Dr. Donna Hansel,  
81 Pathology Chair, will review the prostate biopsy data, prepare the salient results in an Excel  
82 spreadsheet, and the results will be sent as an external data transfer courtesy of Linda McCart  
83 at the Alliance biorepository at Ohio State. **Post-note:** Because of the challenges with resolving  
84 the myriad follow-up data discrepancies in the central pathology spreadsheet, the study team  
85 decided not to incorporate these data in the primary analysis (see the memo-to-file in Appendix  
86 A); rather the statistical report generated from the analysis plan detailed in this document used  
87 the follow-up pathology data collected on the follow-up forms using the case report forms; these  
88 data had been monitored, cleaned, and validated.

89 This study was designed to demonstrate superiority of the experimental arm compared with the  
90 control arm in time to progression (TTP). TTP is defined as the length of time from the date of  
91 random assignment to progression, as defined above; participants who die from any cause  
92 without experiencing disease progression will be censored at the time of death. Additionally,  
93 participants who elect to pursue treatment during the study despite not meeting the criteria for  
94 progression will be censored at the time of withdrawal for treatment.

95 Data from the Toronto cohort [1] indicated that approximately 80% of AS patients will not  
96 experience clinical progression at 24 months. We hypothesize that 90% of AS patients in the  
97 experimental arm of this study will not experience clinical progression at 24 months. Using a  
98 two-sided 0.05-level log-rank test, a sample size of 418 participants (209 per arm) would  
99 provide at least 80% power to reject the null hypothesis of no treatment difference in TTP at 24  
100 months. Fifty-seven events are the total number events that must be observed in the two arms  
101 combined to achieve the specified power for the test comparing survival in the two arms.  
102 Freedman's formula for the required number of events was used [2]. It is recognized that some  
103 participants will elect to pursue treatment during the study despite not meeting the criteria for  
104 progression. These participants will be censored at the time of withdrawal for treatment.  
105 Assuming a 10% dropout rate, including those patients who elect to receive treatment before  
106 progression, the targeted enrollment is 464 patients.

### 107 **Objectives**

108 The primary objective of this study is to determine if a telephone-based dietary intervention  
109 (experimental arm) compared to no intervention (control arm) will decrease clinical progression  
110 in AS patients.

111 There are 3 secondary objectives:

- 112 1. To compare the incidence of active treatment (surgery, irradiation, local ablation, or  
113 androgen deprivation) between the two arms.  
114 2. To compare prostate cancer-related anxiety between the two arms based on the  
115 Memorial Anxiety Scale for Prostate Cancer (MAX-PC).  
116 3. To compare health-related quality of life between the two arms based on the Expanded  
117 Prostate Cancer Composite Index 26 (EPIC-26).

118 The correlative science objectives pertaining to plasma carotenoid levels will be addressed in a  
119 separate statistical analysis plan and, furthermore, selected statistical analyses will be  
120 performed at the University of California San Diego (UCSD). Specifically, the group at Moores  
121 UCSD Cancer Center will analyze the carotenoid concentrations to assess if diet intervention  
122 changes were achieved within the study and whether any changes differed between the two  
123 study arms; these analyses support protocol correlative study objective 10.1.2.1. The statistical  
124 analyses to support the remaining correlative study objectives will be performed at the Alliance  
125 Statistical and Data Center.

126 Lastly, UCSD will also analyze the information obtained from the dietary recall assessments  
127 collected interactively via telephone interview at baseline and at 12 and 24 months post  
128 baseline and will not be reflected in this statistical analysis plan.

### 129 Analysis Populations

130 The following analysis populations will be used:

#### 131 1. Intent-to-Treat

132

133 The intent-to-treat population will include all randomized subjects.  
134

#### 135 2. Modified Intent-to-Treat

136

137 The modified intent-to-treat population will include all randomized subjects, however,  
138 subjects who later become ineligible by centralized pathology review of their baseline  
139 tissue specimens will be excluded; we anticipate that no more than 10% of subjects will  
140 become ineligible for the study following central pathology review [4].

### 141 Demographic and Baseline Characteristics

142 The summaries of demographic and baseline characteristics will be tabulated for the intent-to-  
143 treat and the modified intent-to-treat populations by study arm and overall. For categorical data,  
144 frequencies and percentages will be provided and, for continuous data, descriptive statistics,  
145 including sample size (n), mean, median, standard deviation, and range of values (i.e. minimum  
146 and maximum values) will be provided. No inferential statistics will be presented.

147 The following demographics and baseline characteristics will be summarized in these two  
148 presentations: **age** (years), **age group** ( $\leq 70$ ;  $> 70$ ), **race/ethnicity** (Non-Hispanic White; Black  
149 or African-American; Hispanic or Latino; Asian; Native Hawaiian or Pacific Islander; American-  
150 Indian or Alaska Native; Not Reported; Unknown), **race** (African American; Other), **region**

151 (Midwest; North East; South; West), **body mass index, time since diagnostic prostate**  
152 **biopsy** (0-12 months; 13-24 months prior to registration), **baseline clinical stage** (T1c; T2a),  
153 **baseline PSA ng/mL categories** (0 - 2.5; > 2.5 - 5; >5 but less than 10) and **baseline Gleason**  
154 **sum** (6 and 7).

155 Also, a separate tabular presentation of the number and percentage of subjects within each  
156 baseline clinical stage by age ( $\leq 70$ ;  $> 70$ ) and study arm will be generated, as well as a tabular  
157 presentation of the baseline PSA categories by age ( $\leq 70$ ;  $> 70$ ) and study arm. Additionally, a  
158 cross tabular presentation of baseline Gleason score with baseline PSA categories by study  
159 arm and age ( $\leq 70$ ;  $> 70$ ) will be generated. No inferential statistics will be presented.

160 In a separate tabular presentation, patient responses to the 8 questions on the personal habits  
161 questionnaire administered at baseline only will be summarized by study arm. The  
162 questionnaire addresses a number of generic health behavior questions (e.g. cigarette smoking,  
163 physical activity). No inferential statistics will be presented.

#### 164 **Reasons for Discontinuation**

165 The reasons for discontinuing the study protocol will be summarized in a table overall and by  
166 study arm.

#### 167 **Primary Efficacy Analysis**

168 The primary efficacy analysis will be based on the modified intent-to-treat analysis population.

169 TTP percentages, standard errors, and intervention effect will be obtained from the Kaplan-  
170 Meier method, Greenwood's formula, and log-rank test, respectively.

#### 171 **Supportive Analysis**

172 1. Based on the modified intent-to-treat analysis population, a Cox proportional hazards  
173 regression model will be used to estimate relative risk and 95% confidence interval for  
174 the intervention comparison, adjusting for the following covariates: age group ( $\leq 70$ ;  $>$   
175  $70$ ), race (African American; Other), and time since diagnostic prostate biopsy (0-12  
176 months; 13-24 months prior to registration).

177  
178 2. We will repeat the univariate analysis based on the Kaplan-Meier method using the  
179 intent-to-treat analysis population.

#### 180 **Additional Analysis**

181 1. We will repeat the primary efficacy analysis based on the Kaplan-Meier method where  
182 clinical progression only considers Gleason score in its definition (i.e. for men  $< 70$  years  
183 old, Gleason sum on repeat biopsy  $\geq 7$ ; for men  $\geq 70$  years old, Gleason sum on repeat  
184 biopsy  $\geq (4 + 3) = 7$ ); in other words, the definition of clinical progression in this analysis  
185 will ignore serial PSA values and changes in tumor volume.

186

- 187 2. Similarly, we will repeat the supportive Cox proportional hazards regression analysis  
188 above where clinical progression only considers Gleason score in its definition.  
189
- 190 3. Based on the modified intent-to-treat analysis population, we will analyze progression-  
191 free survival, defined as time to clinical progression or death, whichever occurs first,  
192 based on the Kaplan-Meier method where clinical progression is defined as in the  
193 primary efficacy analysis.

#### 194 **Secondary Efficacy Analysis**

195 The secondary analysis will be based on the modified intent-to-treat analysis population.

196 It is recognized that some participants will elect to pursue treatment during the study despite not  
197 meeting the criteria for progression. Time to treatment percentages, standard errors, and  
198 intervention effect will be obtained from the Kaplan-Meier method, Greenwood's formula, and  
199 log-rank test, respectively. For this analysis, subjects who do not withdrawal from the study to  
200 pursue treatment will be censored at the time of clinical progression, death, or their last follow-  
201 up visit, whichever occurs first. Additionally, we will report the number and percentage of  
202 subjects who withdrew from the study to pursue treatment within the two study arms; a Fisher's  
203 exact test of independence will be conducted to assess whether the proportions are different  
204 between the study arms.

#### 205 **Exploratory Analysis**

206 Weight (kg) and height (cm) are measured at baseline and at study months 6, 12, 18, and 24.  
207 Weight and body mass index (weight (in kilograms) divided by height (in meters) squared) will  
208 be summarized longitudinally for each study arm within the modified intent-to-treat population;  
209 descriptive summary statistics will include sample size (n), mean, median, standard deviation,  
210 and range of values (i.e. minimum and maximum values). Additionally, weight and body mass  
211 index measured serially will be plotted. No inferential statistics will be presented.

212 Although data of whether or not MRI-guided prostate biopsy was performed was not collected  
213 as part of the protocol, these data will be obtained externally. Because the MRI-guidance  
214 technology was not widely available when the study was activated in 2010, we expect that very  
215 few biopsies would have been performed in this manner. Interest is in the frequency of use of  
216 MRI-guided prostate biopsies in the two arms and overall. Therefore, the number and  
217 proportion of MRI-guided prostate biopsies performed at baseline and at study months 12 and  
218 24 will be presented in a table within each study arm and overall.

219 Within the intervention arm, patients were administered the Nutrition Self-Efficacy Scale, which  
220 assesses the degree to which individuals are confident that they can control their nutrition.  
221 Each of the 5 items rated on a 5-point Likert scale ranging from "very confident" to "not confident  
222 at all" will be summarized within the intervention arm at baseline and at study months 6, 12, 18,  
223 and 24; descriptive summary statistics will include sample size (n), mean, median, standard  
224 deviation, and range of values (i.e. minimum and maximum values). No inferential statistics will  
225 be presented.

226 Because quality of life or anxiety has not been formally evaluated in an AS population or in the  
227 setting of a randomized clinical trial among AS patients, a battery of scores will be assessed  
228 longitudinally in the current study. These analyses are largely descriptive and exploratory in  
229 nature; any inferential statistics calculated should be interpreted with care. Tabulated  
230 descriptive statistics will include n, mean (standard deviation), and median [min, max]. The  
231 median of the total summary scores obtained from each quality of life / anxiety instruments will  
232 be plotted serially over time (i.e. baseline and at study months 6, 12, 18, and 24). All available  
233 longitudinal data will be summarized within the modified intent-to-treat population; no data  
234 imputation will be performed in these exploratory analyses.

235 The 4 quality of life / anxiety instruments that will be summarized are the Memorial Anxiety  
236 Scale for Prostate Cancer (MAX-PC), the Expanded Prostate Cancer Index Composite 26  
237 (EPIC-26), the Functional Assessment of Cancer Therapy Scale – Prostate (FACT-P), and the  
238 International Prostate Symptom Score (IPSS). Appendix B provides the scoring algorithms for  
239 the battery of instruments used in the study.

#### 240 MAX-PC

241 The 3 subscale summary scores and the total summary score on the MAX-PC will be  
242 summarized at each protocol defined time point (i.e. at baseline and at study months 6, 12, 18,  
243 and 24); additionally, the corresponding within-subject change from baseline will be summarized  
244 at post-baseline study months. To assess evidence against the null hypothesis that the median  
245 scores are the same in the two study arms, two-sided p-values obtained from the Wilcoxon  
246 rank-sum test will be calculated and provided at each study time point.

#### 247 EPIC-26

248 The summary scores obtained from the 5 health-related quality of life domains and the total  
249 summary score on the EPIC-26 will be summarized at each protocol defined time point (i.e. at  
250 baseline and at study months 6, 12, 18, and 24); additionally, the corresponding within-subject  
251 change from baseline will be summarized. To assess evidence against the null hypothesis that  
252 the median scores are the same in the two study arms, two-sided p-values obtained from the  
253 Wilcoxon rank-sum test will be calculated and provided at each study time point.

#### 254 FACT-P

255 All subscale summary scores (for the core FACT-G and for the FACT-P) and the total summary  
256 score on the FACT-P quality of life questionnaire will be summarized at each protocol defined  
257 time point (i.e. at baseline and at study months 6, 12, 18, and 24); additionally, the  
258 corresponding within-subject change from baseline will be summarized. To assess evidence  
259 against the null hypothesis that the median scores are the same in the two study arms, two-  
260 sided p-values obtained from the Wilcoxon rank-sum test will be calculated and provided at  
261 each study time point.

262

263 IPSS

264 The IPSS total summary score and the quality-of-life-due-to-urinary-symptoms score will be  
265 summarized at each protocol defined time point (i.e. at baseline and at study months 6, 12, 18,  
266 and 24); additionally, the corresponding within-subject change from baseline will be summarized.  
267 To assess evidence against the null hypothesis that the median scores are the same in the two  
268 study arms, two-sided p-values obtained from the Wilcoxon rank-sum test will be calculated and  
269 provided at each study time point.

270 **General Analysis Issues**

271

272 Significance Level

273

274 The primary efficacy hypothesis test will be performed using a 5% overall significance level. For  
275 the secondary efficacy analyses, as well as any supportive or additional analyses, hypothesis  
276 tests will be performed individually at the 5% significance level and there will be neither  
277 adjustment for multiple tests nor adjustment for multiplicity of endpoints. All hypothesis tests will  
278 be performed with two-sided alternative hypotheses. Any two-way interaction effects assessed,  
279 e.g. in the multivariable Cox proportional hazards regression models, will be tested at a 15%  
280 significance level.

281

282 Missing Data

283 In the event that we do not have a subject's centrally reviewed Gleason score at a protocol  
284 defined time point, the corresponding local Gleason score recorded on the study case report  
285 form will be used.

286 For the exploratory analyses, no missing data will be imputed. All subjects will have the time to  
287 event endpoint for the primary and secondary efficacy analyses. In the event that a subject is  
288 missing a baseline covariate included in the multivariable Cox proportional hazards regression  
289 models, the missing-indicator method will be used to preserve the full analysis population used  
290 (e.g. modified intent-to treat analysis population) [5].

291

292



293 **APPENDIX A**294  
295**Memo-to-File**

---

296 **Protocol Number:** 70807

297 **Protocol Title:** The Men's Eating and Living (MEAL) Study: A Randomized Trial of Diet to Alter  
298 Disease Progression in Prostate Cancer Patients on Active Surveillance

299 **Study Chair:** J. Kellogg Parsons, M.D., MHS

300 **Study Statisticians:** David Zahrieh and Heshan Liu

301 **Statistical Programmer Analyst:** Libby Storricks

---

302 **Purpose:** To document the study team's decision **not** to resolve the remaining data discrepancies in the central  
303 pathology external database; the external database is an Excel spreadsheet and has been saved in the project  
304 workspace. Further, the purpose is to document that the ineligible cases we identified immediately post-database  
305 freeze (04APR2018) - based on review of the central pathology spreadsheet - remained ineligible and that the  
306 handful of potential ineligible cases that the Alliance Statistics and Data Center (SDC) had identified while performing  
307 further quality control on the external spreadsheet were indeed still eligible. In other words, no changes to the  
308 primary analysis population described in the statistical summary (*CALGB 70807 Statistical Summary20180504.docx*)  
309 were needed and thus no updates to the final analyses on the primary endpoint were needed.

310 **Background**

311 Centralized pathology review was conducted on tissue specimens collected at diagnosis and at study months 12 and  
312 24 to determine changes in tumor volume and Gleason scores; additionally, centralized pathology review was  
313 conducted on tissue specimens based on repeat biopsies (i.e. additional biopsies) that occurred at the discretion of  
314 the treating physician during the 24-month study period. The centrally reviewed changes in tumor volume and  
315 Gleason scores was to be used in lieu of the local changes in tumor volume and Gleason scores, which were  
316 captured on the case report forms, in the definition of clinical progression. Stated differently, the centrally reviewed  
317 pathology was to be incorporated in all relevant analyses described in the statistical analysis plan; however, in the  
318 event that centrally reviewed pathology was unavailable for a particular patient (and time point), the corresponding  
319 local pathology information captured on the case report form (if available) was to be used. Dr. Donna Hansel,  
320 Pathology Chair, reviewed the prostate biopsy data, prepared the salient results in an Excel spreadsheet, and the  
321 results were sent as an external data transfer courtesy of Linda McCart at the Alliance biorepository at Ohio State.

322 **Summary**

323 Resolving the myriad data discrepancies in the central pathology spreadsheet, which were identified by the members  
324 of the Alliance SDC, has been a struggle since the final data freeze (04APR2018) and was further confounded by the  
325 departure of the Pathology Chair, Dr. Donna Hansel. Therefore, it was jointly decided that no further resolution of  
326 the discrepancies would be pursued. However, the study team did focus their efforts on carefully reviewing the  
327 baseline central pathology results contained in the external spreadsheet in order to facilitate the determination of  
328 ineligible cases; per the protocol, patients who later become ineligible by centralized pathology review were to be  
329 excluded from the primary analysis population. The ineligible cases we identified immediately post-database freeze  
330 and re-reviewed/discussed on 21MAR2019 remained and the handful of potential ineligible cases that the SDC  
331 identified were indeed still eligible. In other words, no changes to the primary analysis population described in the  
332 statistical summary (and saved out to our project workspace) were needed and thus no updates to the final analyses  
333 on the primary endpoint were needed.

334 **APPENDIX B**

335 MAX-PC, a prostate cancer-specific measure to assess patient anxiety due to prostate cancer,  
336 comprises 3 subscales that measure general prostate cancer anxiety (11 items), anxiety related  
337 to PSA levels (3 items), and fear of recurrence (4 items). The sum of the scores on all 3  
338 domains constitutes the total summary score of MAX-PC (18 items in total). Subscale summary  
339 scores will be calculated as the average value of each subscale domain, and the total summary  
340 score will be the average value across all 18 items.

341 FACT-P, a prostate cancer specific quality of life questionnaire, is a 39-item questionnaire  
342 consisting of 5 domains: physical well-being (7 items), social/family well-being (7 items),  
343 emotional well-being (6 items), functional well-being (7 items) and additional concerns (12  
344 items). Scores can range between 0 and 156. A subscale summary score can be generated for  
345 each domain. The sum of the scores on the first 4 domains constitutes the FACT-G (27 core  
346 quality of life measures / items). The sum of the scores across all 5 domains constitutes the  
347 FACT-P. The SAS program for scoring the FACT-P can be found in the QOL forms bank.

348 EPIC-26 contains 5 multi-item health-related quality of life domains relevant to prostate cancer:  
349 urinary incontinence (4 items), urinary irritation/obstruction (4 items), bowel (6 items), sexual (6  
350 items) and vitality/hormonal function (5 items); in addition, the EPIC-26 retains the single item  
351 measure of overall urinary bother. Refer to the scoring instructions for the EPIC-26 saved in the  
352 Alliance team directory; the SAS program for scoring the EPIC-26 can be found in the QOL  
353 forms bank.

354 IPSS, which measures lower urinary tract symptoms, is an 8 question (7 symptom questions + 1  
355 quality of life question). The 7 symptom questions include feeling of incomplete bladder  
356 emptying, frequency, intermittency, urgency, weak stream, straining, and nocturia over the last  
357 month; each question is assigned a score from 1 to 5 for a total of maximum 35 points. The 8th  
358 question of quality of life is assigned a score of 1 to 6.

359 **Note: All subscale summary scores and total summary scores will be transformed into 0**  
360 **to 100 scales, with higher scores representing favorable health-related quality of life.**

361

362

363 **REFERENCES**

- 364 1. Klotz L, Zhang L, Adam L, Nam R, Mamedov A, Loblaw A. Clinical results of long-term  
365 follow-up of a large, active surveillance cohort with localized prostate cancer. *Journal of*  
366 *Clinical Oncology*, 2010; 28(1):126-131.  
367
- 368 2. Freedman, L.S. Tables of the number of patients required in clinical trials using the log-rank  
369 test. *Statistics in Medicine*, 2009; 1, 121-129.  
370
- 371 3. Memorial Sloan-Kettering Cancer Center cancer information: prostate nomogram.  
372 [Accessed November 2017]. Available at: <http://www.mskcc.org/mskcc/html/10088.cfm>.  
373
- 374 4. Fine SW, Epstein JI. A contemporary study correlating prostate needle biopsy and radical  
375 prostatectomy Gleason score. *Journal of Urology*, 2008; 179(4):1335-1339.  
376
- 377 5. Groenwold RH, White IR, Donders AR, Carpenter JR, Altman DG, Moons KG. Missing  
378 covariate data in clinical research: when and when not to use the missing-indicator method  
379 for analysis. *CMAJ*, 2012; 184(11):1265-9.
