# Supplementary material
Source: PubMed Central journal article supplement (PMC6990696)
Supplement: jama-323-140-s003.pdf [file jama-323-140-s003.pdf]

## Supplementary Online Content

Parsons JK, Zahrieh D, Mohler JL, et al. Effect of vegetable consumption on cancer progression among men with early-stage prostate cancer: the MEAL randomized clinical trial. *JAMA*. doi:10.1001/jama.2019.20207

**eTable.** Dietary Patterns in the Men's Eating and Living (MEAL) Study

**eFigure.** Additional Analysis of Dietary Patterns of Study Participants

This supplementary material has been provided by the authors to give readers additional information about their work.

**eTable.** Dietary Patterns in the Men's Eating and Living (MEAL) Study (CALGB 70807 [Alliance])

|                                                      | MEAL Intervention               |                                  |              |                   |                                |              |                    | Control                          |                               |                   |                                |              |
|------------------------------------------------------|---------------------------------|----------------------------------|--------------|-------------------|--------------------------------|--------------|--------------------|----------------------------------|-------------------------------|-------------------|--------------------------------|--------------|
|                                                      | Baseline<br>N =237              | 12-month<br>N = 236              |              | 24-month<br>N=233 |                                |              | Baseline<br>N =241 | 12-month<br>N = 240              |                               | 24-month<br>N=238 |                                |              |
|                                                      | Mean<br>(95% CI)                | Mean Change<br>(95% CI)          | p-<br>value* | p-<br>value†      | Mean Change<br>(95% CI)        | p-<br>value* | p-<br>value†       | Mean<br>(95% CI)                 | Mean Change<br>(95% CI)       | p-<br>value*      | Mean Change<br>(95% CI)        | p-<br>value* |
| <b>Energy<br/>(kcal/day)</b>                         | 2145.93<br>(2081.68, 2210.17)   | -230.87<br>(-296.01, -165.72)    | < 0.001      | 0.23              | -250.01<br>(-315.43, -184.59)  | < 0.001      | < 0.001            | 2099.53<br>(2035.83, 2163.24)    | -174.44<br>(-239.04, -109.84) | < 0.001           | -130.3<br>(-195.08, -65.52)    | < 0.001      |
| <b>Dark green<br/>vegetables<br/>(servings/day)</b>  | 0.51<br>(0.41, 0.61)            | 0.64<br>(0.52, 0.76)             | < 0.001      | < 0.001           | 0.54<br>(0.42, 0.66)           | < 0.001      | < 0.001            | 0.42<br>(0.33, 0.52)             | 0.2<br>(0.08, 0.32)           | 0.001             | 0.14<br>(0.03, 0.26)           | 0.02         |
| <b>Deep yellow<br/>vegetables<br/>(servings/day)</b> | 0.18<br>(0.12, 0.23)            | 0.3<br>(0.24, 0.37)              | < 0.001      | < 0.001           | 0.19<br>(0.12, 0.25)           | < 0.001      | 0.003              | 0.21<br>(0.15, 0.26)             | 0.06<br>(0, 0.13)             | 0.05              | 0.06<br>(-0.02, 0.11)          | 0.13         |
| <b>Tomatoes<br/>(servings/day)</b>                   | 0.54<br>(0.48, 0.61)            | 0.18<br>(0.1, 0.26)              | < 0.001      | < 0.001           | 0.06<br>(-0.02, 0.14)          | 0.17         | 0.02               | 0.56<br>(0.49, 0.62)             | -0.04<br>(-0.13, 0.04)        | 0.30              | -0.09<br>(-0.17, 0)            | 0.04         |
| <b>Legumes<br/>(servings/day)</b>                    | 0.24<br>(0.19, 0.29)            | 0.15<br>(0.08, 0.22)             | < 0.001      | 0.02              | 0.18<br>(0.12, 0.25)           | < 0.001      | 0.002              | 0.22<br>(0.16, 0.27)             | 0.03<br>(-0.03, 0.1)          | 0.32              | 0.03<br>(-0.03, 0.1)           | 0.32         |
| <b>Other<br/>vegetables<br/>(servings/day)</b>       | 1.23<br>(1.1, 1.35)             | 0.64<br>(0.5, 0.79)              | < 0.001      | < 0.001           | 0.46<br>(0.31, 0.6)            | < 0.001      | < 0.001            | 1.23<br>(1.1, 1.35)              | 0.1<br>(-0.04, 0.24)          | 0.16              | 0.04<br>(-0.1, 0.18)           | 0.56         |
| <b>Vegetable<br/>juice<br/>(servings/day)</b>        | 0.06<br>(0.03, 0.08)            | -0.06<br>(-0.09, -0.02)          | 0.001        | 0.15              | -0.06<br>(-0.09, -0.02)        | 0.001        | 0.001              | 0.10<br>(0.07, 0.12)             | -0.1<br>(-0.13, -0.06)        | < 0.001           | -0.1<br>(-0.13, -0.06)         | 0.15         |
| <b>Cruciferous<br/>vegetables<br/>(gm/day)</b>       | 22.5<br>(16.21, 28.79)          | 43.1<br>(35.21, 50.99)           | < 0.001      | < 0.001           | 29.86<br>(21.94, 37.78)        | < 0.001      | < 0.001            | 28.05<br>(21.81, 34.29)          | 6.44<br>(-1.39, 14.26)        | 0.11              | -0.40<br>(-8.24, 7.45)         | 0.92         |
| <b>Cruciferous<br/>vegetables<br/>(servings/day)</b> | 0.32<br>(0.23, 0.41)            | 0.71<br>(0.6, 0.83)              | < 0.001      | < 0.001           | 0.5<br>(0.38, 0.61)            | < 0.001      | < 0.001            | 0.39<br>(0.3, 0.48)              | 0.12<br>(0.01, 0.23)          | 0.04              | 0.01<br>(-0.1, 0.12)           | 0.84         |
| <b>Total<br/>vegetables<br/>(servings/day)</b>       | 3.38<br>(3.12, 3.63)            | 2.43<br>(2.17, 2.69)             | < 0.001      | < 0.001           | 2.01<br>(1.75, 2.28)           | < 0.001      | < 0.001            | 3.39<br>(3.14, 3.64)             | 0.45<br>(0.19, 0.7)           | < 0.001           | 0.37<br>(0.11, 0.62)           | 0.006        |
| <b>Red meat<br/>(gm/day)</b>                         | 52.17<br>(46.2, 58.14)          | -11.54<br>(-19.03, -4.06)        | 0.001        | 0.75              | -7.34<br>(-14.85, .17)         | 0.06         | 0.42               | 52.64<br>(46.72, 58.56)          | -9.83<br>(-17.26, -2.41)      | 0.01              | -3.04<br>(-10.48, 4.4)         | 0.42         |
| <b>Fat<br/>(gm/day)</b>                              | 35.47<br>(34.61, 36.34)         | -2.09<br>(-3.01, -1.17)          | < 0.001      | 0.004             | -1.77<br>(-2.69, -0.85)        | < 0.001      | 0.003              | 34.93<br>(34.08, 35.79)          | -0.17<br>(-1.08, 0.74)        | 0.71              | 0.21<br>(-0.7, 1.13)           | 0.65         |
| <b>Saturated fat<br/>(gm/day)</b>                    | 11.49<br>(11.11, 11.87)         | -1.69<br>(-2.07, -1.3)           | < 0.001      | < 0.01            | -0.94<br>(-1.33, -0.55)        | < 0.001      | 0.003              | 11.38<br>(11, 11.76)             | -0.44<br>(-0.82, -0.06)       | 0.02              | -0.12<br>(-0.5, 0.27)          | 0.42         |
| <b>Lycopene<br/>(mcg/day)</b>                        | 5455.24<br>(4265.99, 6644.49)   | 7125.95<br>(5682.17, 8569.73)    | < 0.001      | < 0.001           | 5179.06<br>(3729.67, 6628.45)  | < 0.001      | < 0.001            | 5704.5<br>(4525.16, 6883.84)     | 135.55<br>(-1296.16, 1567.27) | 0.85              | -466.247<br>(-1901.6, 969.11)  | 0.52         |
| <b>Total<br/>carotenoids<br/>(mcg/day)</b>           | 12103.3<br>(10485.63, 13720.97) | 13839.31<br>(11960.15, 15718.48) | < 0.001      | < 0.001           | 9687.87<br>(7801.18, 11574.57) | < 0.001      | < 0.001            | 12284.62<br>(10680.43, 13888.81) | 2030.79<br>(167.32, 3894.25)  | 0.03              | 324.728<br>(-1543.61, 2193.07) | 0.73         |

\* within-group changes, values at each follow-up compared to baseline; † changes in intervention compared to changes in control; p-values based on a mixed model analysis

**eFigure.** Additional Analysis of Dietary Patterns of Study Participants

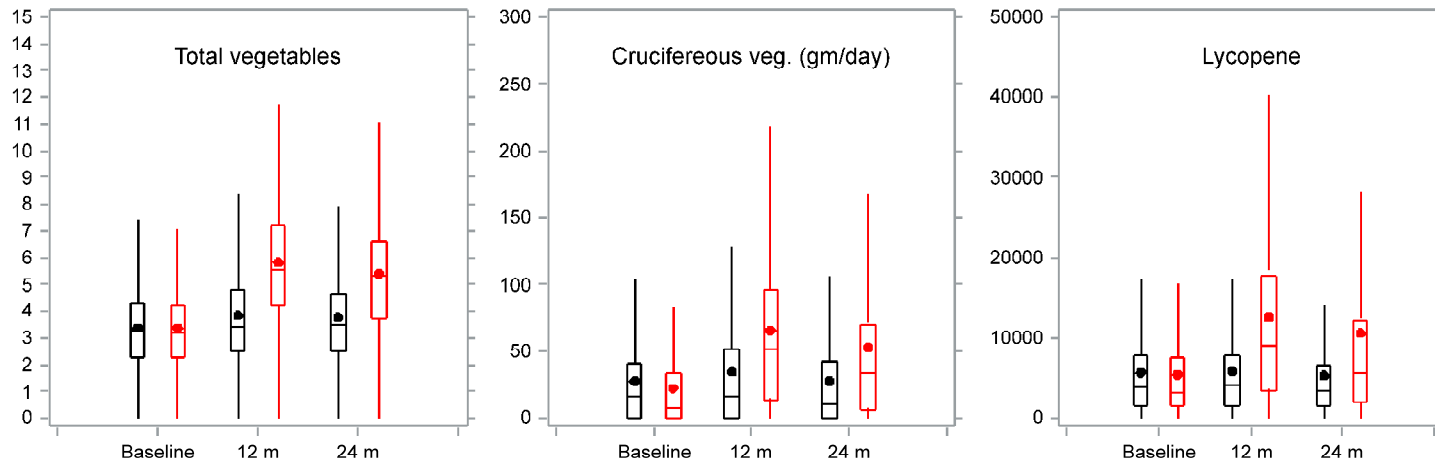

The central box spans the quartiles and the line in the box marks the median, while the filled circle represents the mean. Lines extend from the box out to the smallest and largest observations that are not suspected outliers. Black = control group; Red = intervention group.
