# Supplementary material
Source: PubMed Central journal article supplement (PMC6990696)
Supplement: jama-323-140-s004.pdf [file jama-323-140-s004.pdf]

## Data Sharing Statement

Parsons. Effect of Vegetable Consumption on Cancer Progression Among Men With Early-Stage Prostate Cancer. *JAMA*. Published January 14, 2020. 10.1001/jama.2019.20207

### Data

**Data available:** Yes

**Data types:** Deidentified participant data, Data dictionary

**How to access data:** [Zahrieh.David@mayo.edu](mailto:Zahrieh.David@mayo.edu)

**When available:** With publication

### Supporting Documents

**Document types:** None

### Additional Information

**Who can access the data:** Researchers whose proposed use of the data has been approved

**Types of analyses:** For a specified purpose

**Mechanisms of data availability:** With a signed data access agreement

**Any additional restrictions:** none
